# Supplementary material for: Water Softening Using a Light-Responsive, Spiropyran-Modified Nanofiltration Membrane
Source: MDPI journal article supplement (doi:10.3390/polym11020344), 2019-02-15
Supplement: s1 [file s1]

## **Water Softening Using a Light-Responsive, Spiropyran-Modified Nanofiltration Membrane**

**Rasel Das,<sup>1</sup> Mathias Kuehnert,<sup>1</sup> Asieh Sadatkazemi,<sup>2</sup> Yaser Abdi,<sup>2</sup> and Agnes Schulze<sup>1,\*</sup>**

<sup>1</sup> Leibniz Institute of Surface Engineering (IOM), Permoserstr. 15, 04318 Leipzig, Germany

<sup>2</sup> Nanophysics Research Laboratory, Department of Physics, University of Tehran

\* Correspondence: agnes.schulze@iom-leipzig.de; Tel.: +49-341-235-2400

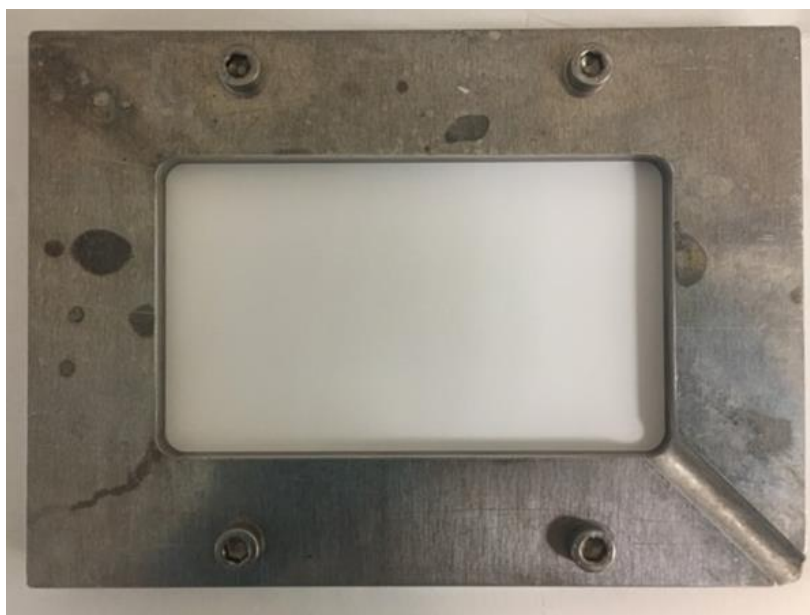

**Figure S1.** Clamping of PES using two stainless steel frames for controlling the interfacial polymerization on the top side of the PES support membrane.

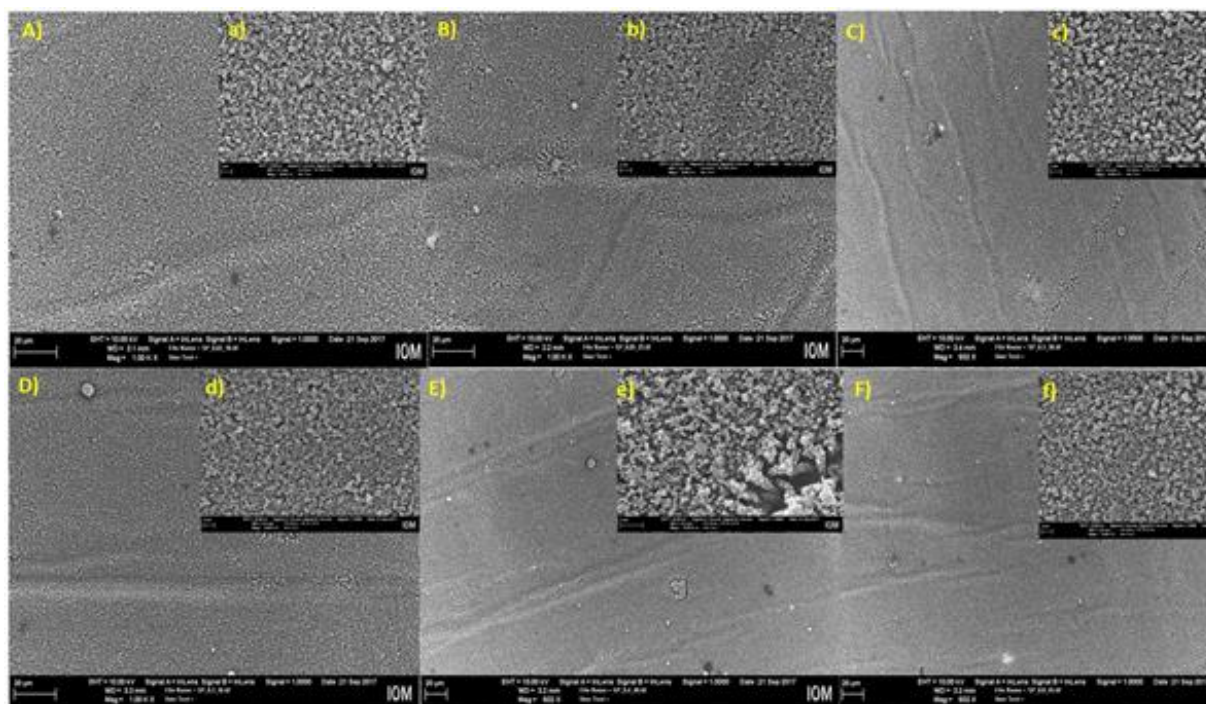

**Figure S2.** Low-resolution SEM images of PES/PA-TFC-SP membranes treated with 0.02 (A), 0.05 (B), 0.10 (C), 0.20 (D), 0.40 (E), and 0.80 wt % SP (F) with their corresponding high-resolution images (inset).

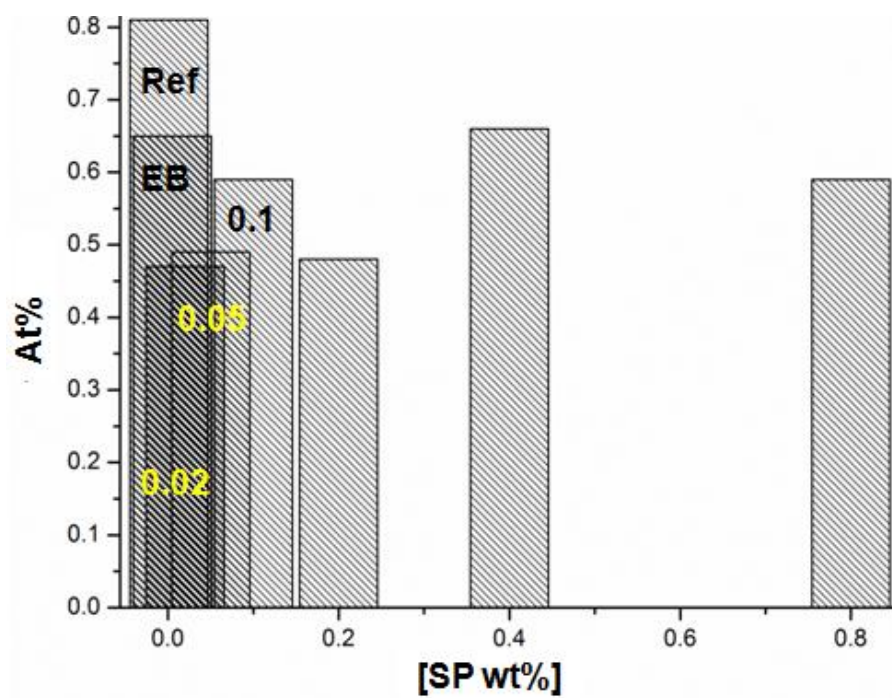

**Figure S3.** XPS atomic percentage of chlorine in reference PES/PA-TFC, EB-treated, and PES/PA-TFC-SP membranes.
